# Supplementary material for: Valorization of Wild-Type Cannabis indica by Supercritical CO2 Extraction and Insights into the Utilization of Raffinate Biomass
Source: MDPI journal article supplement (doi:10.3390/molecules28010207), 2022-12-26
Supplement: s1 [file s1]

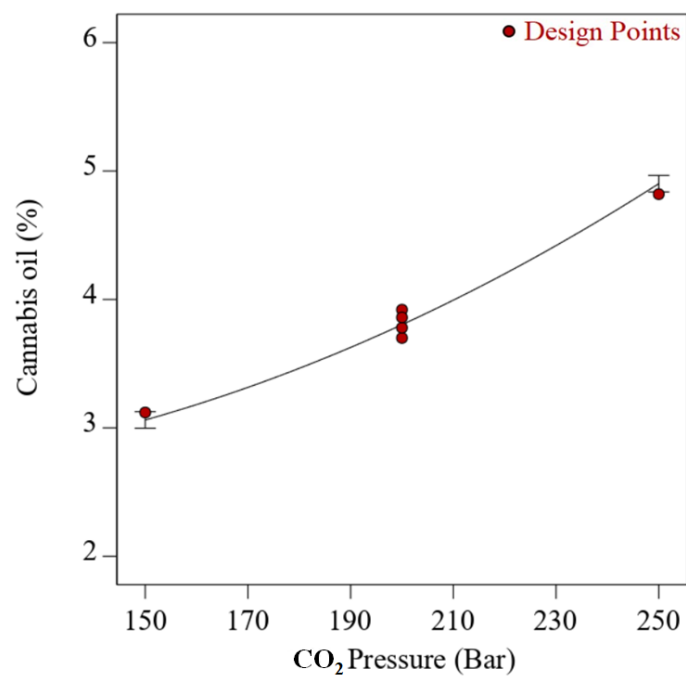

Fig. S1: Effects of CO<sub>2</sub> pressure on cannabis oil yield at a constant temperature (40°C) and extraction time (1.5 h)

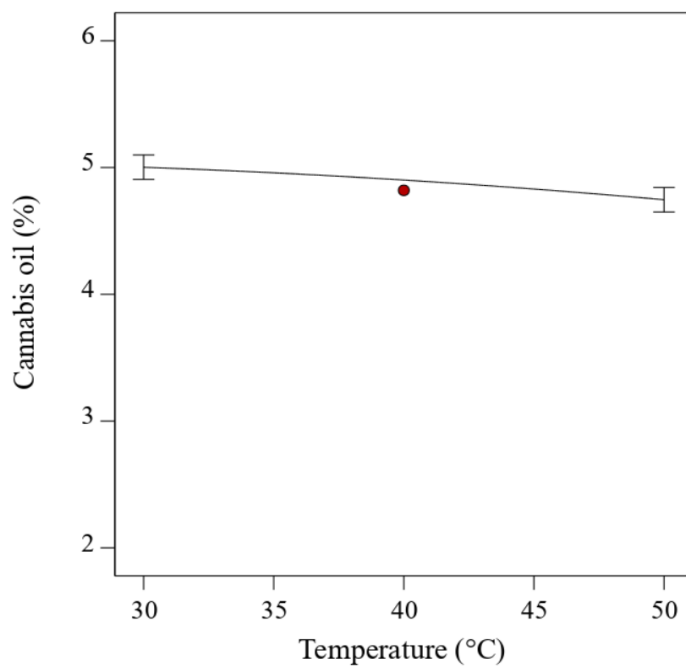

Fig. S2: Effects of temperature on cannabis oil yield at constant CO<sub>2</sub> pressure (250 bar) and extraction time (1.5 h)

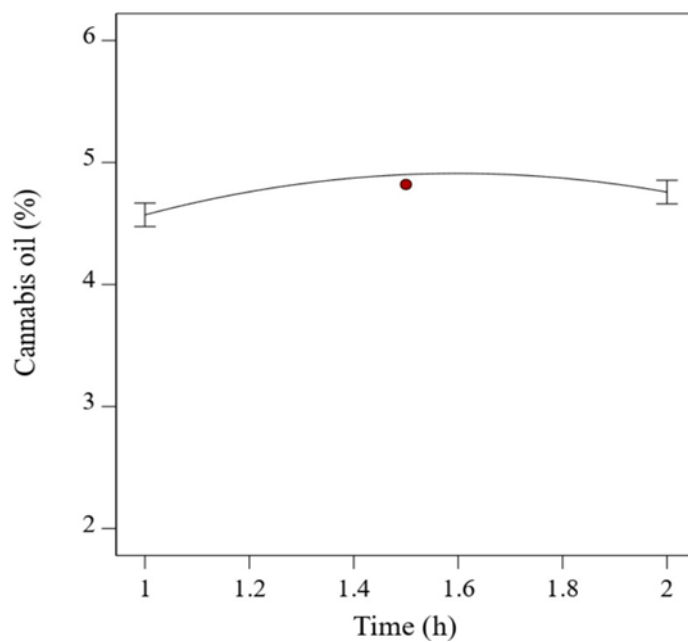

Fig. S3: Effects of extraction time on cannabis oil yield at constant temperature (40°C) and CO<sub>2</sub> pressure (250 bar)

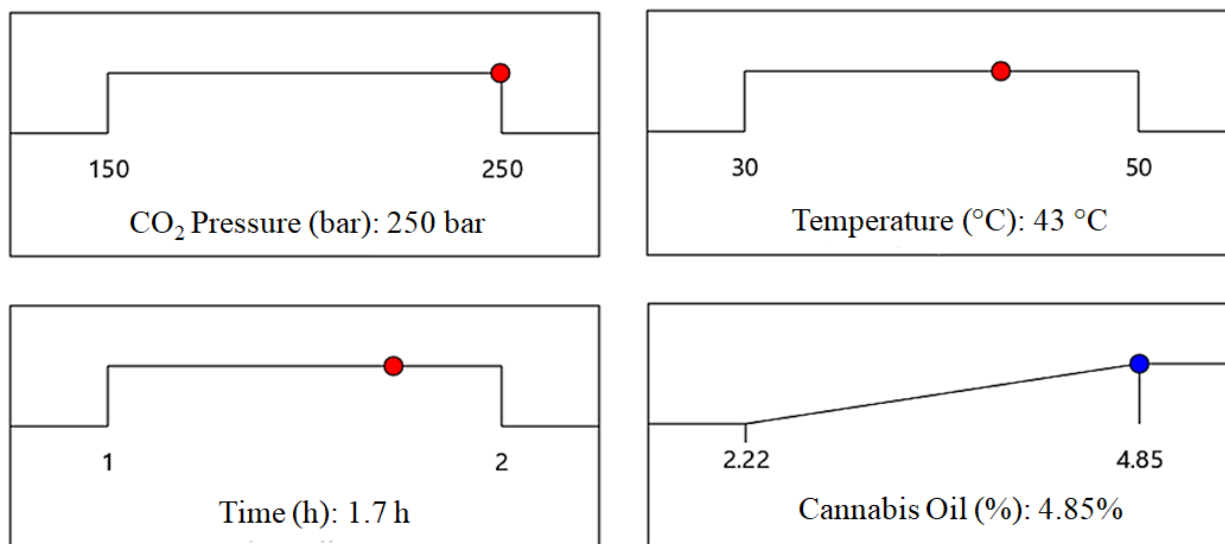

Fig. S4: Optimized conditions of SCCO<sub>2</sub> generated from the statistical model

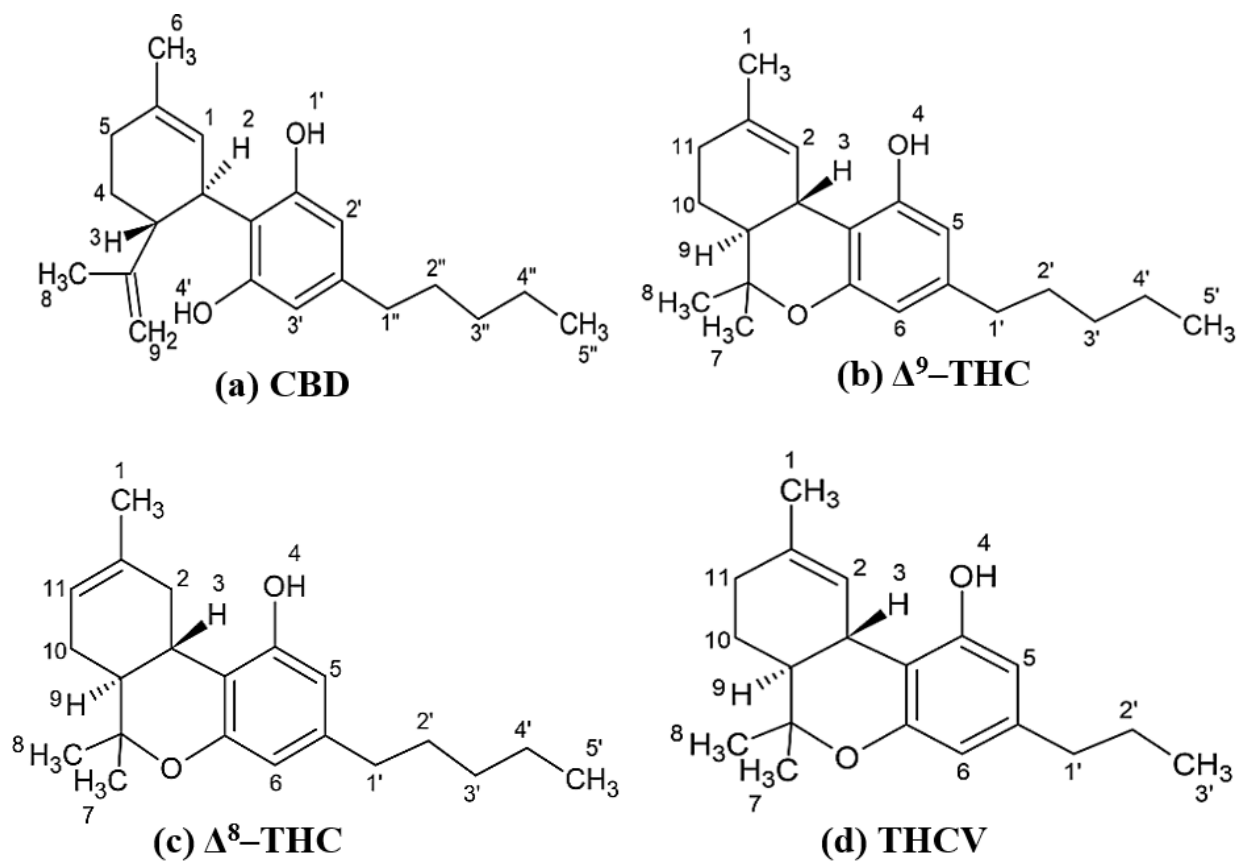

Fig. S5: Chemical structures of (a) CBD, (b)  $\Delta^9$ -THC, (c)  $\Delta^8$ -THC and (d) THCV.

**Table S1.** Comparison between the experimental and predicted yield of cannabis oil.

| Experimental run | Experimental value (%) | Predicted value (%) | Error (%) |
|------------------|------------------------|---------------------|-----------|
| 1                | 3.4                    | 3.4                 | 2.9       |
| 2                | 4.9                    | 4.8                 | 0.4       |
| 3                | 4.9                    | 4.9                 | 1.6       |
| 4                | 2.2                    | 2.3                 | 1.8       |
| 5                | 3.7                    | 3.8                 | 2.6       |
| 6                | 3.5                    | 3.4                 | 1.2       |
| 7                | 4.8                    | 4.7                 | 1.1       |
| 8                | 3.1                    | 3.1                 | 2.0       |
| 9                | 3.6                    | 3.7                 | 1.9       |
| 10               | 3.9                    | 3.9                 | 1.3       |
| 11               | 3.8                    | 3.8                 | 0.5       |
| 12               | 2.9                    | 2.9                 | 0.7       |
| 13               | 2.7                    | 2.6                 | 1.5       |
| 14               | 3.9                    | 3.8                 | 1.6       |
| 15               | 3.7                    | 3.7                 | 2.0       |
| 16               | 4.4                    | 4.4                 | 0.7       |
| 17               | 4.7                    | 4.6                 | 0.9       |
| 18               | 3.9                    | 3.8                 | 3.2       |

**Table S2.** Design of experiments for SCCO<sub>2</sub> extraction of cannabis leaves.

| Experimental run | CO <sub>2</sub> pressure (bar) | Temperature (°C) | Time (h) |
|------------------|--------------------------------|------------------|----------|
| 1                | 150                            | 50               | 2        |
| 2                | 250                            | 30               | 2        |
| 3                | 250                            | 40               | 1.5      |
| 4                | 150                            | 30               | 1        |
| 5                | 200                            | 40               | 1.5      |
| 6                | 200                            | 40               | 1        |
| 7                | 250                            | 30               | 1        |
| 8                | 150                            | 40               | 1.5      |
| 9                | 200                            | 30               | 1.5      |
| 10               | 200                            | 50               | 1.5      |
| 11               | 200                            | 40               | 1.5      |
| 12               | 150                            | 50               | 1        |
| 13               | 150                            | 30               | 2        |
| 14               | 200                            | 40               | 1.5      |
| 15               | 200                            | 40               | 2        |
| 16               | 250                            | 50               | 1        |
| 17               | 250                            | 50               | 2        |
| 18               | 200                            | 40               | 1.5      |

Note: The amount of biomass and CO<sub>2</sub> flow rate were kept constant at 100 g and 35 g/min for all the runs.
